# Supplementary material
Source: MDPI journal article supplement (https://www.mdpi.com/2410-3888/6/3/37)
Supplement: s1 [file s1]

Supplementary Materials

# Deep Heat: A Comparison of Water Temperature, Anemone Bleaching, Anemonefish Density and Reproduction between Shallow and Mesophotic Reefs

Anne Haguenauer <sup>1</sup>, Frédéric Zuberer <sup>1</sup>, Gilles Siu <sup>1</sup>, Daphne Cortese <sup>1,2</sup>, Ricardo Beldade <sup>3,\*†</sup> and Suzanne C. Mills <sup>1‡</sup>

<sup>1</sup> USR 3278 CRIOBE, PSL Université Paris: EPHE-UPVD-CNRS, BP 1013, Papetoai, 98729 Moorea, French Polynesia; anne.haguenauer@criobe.pf (A.H.); frederic.zuberer@criobe.pf (F.Z.); gilles.siu@criobe.pf (G.S.); daph.cortese@gmail.com (D.C.); suzanne.mills@univ-perp.fr (S.C.M.)

<sup>2</sup> Institute of Biodiversity, Animal Health and Comparative Medicine, University of Glasgow, Glasgow, UK

<sup>3</sup> Estación Costera de Investigaciones Marinas, Pontificia Universidad Católica de Chile, FAC Ciencias Biol, 8331150, Santiago, Chile

\* Correspondence: rbeldade@bio.puc.cl

† Millenium Nucleus for the Ecology and Conservation of Temperate Mesophotic Reef Ecosystems (NUTME), Chile.

‡ Laboratoire d'Excellence "CORAIL", France.

**Table S1.** Clownfish transects.

| Island                       | Transect length (m) | Transect width (m) | Transects area | Transects area m2 | Clownfish nbr | Clown density 100,000 m2 | x diff by depth |
|------------------------------|---------------------|--------------------|----------------|-------------------|---------------|--------------------------|-----------------|
| <b>Tahiti meso</b>           | 6000                | 50                 | 300,000        |                   |               |                          |                 |
|                              | 1000                | 100                | 100,000        | 400,000           | 3             | 0.075                    |                 |
| <b>Tahiti shallow</b>        | 6000                | 50                 | 300,000        |                   |               |                          |                 |
|                              | 1000                | 100                | 100,000        | 400,000           | 76            | 1.90                     | 25.33           |
| <b>Moorea meso</b>           | 100                 | 10                 | 1000           |                   |               |                          |                 |
|                              | 200                 | 100                | 20,000         |                   |               |                          |                 |
|                              | 150                 | 30                 | 4500           |                   |               |                          |                 |
|                              | 200                 | 30                 | 6000           | 31,500            | 6             | 1.90                     |                 |
| <b>Moorea shallow</b>        | <b>400</b>          | <b>10</b>          | <b>4000</b>    |                   |               |                          |                 |
|                              |                     |                    | 16,000         |                   |               |                          |                 |
|                              |                     |                    | 2,800,000      | 2,800,000         | 500           | 1.79                     | 0.94            |
| <b>Tikehau meso</b>          | 800                 | 20                 | 16,000         |                   |               |                          |                 |
|                              |                     |                    |                | 16,000            | 2             | 0.0125                   |                 |
| <b>Tikehau shallow lagon</b> | 800                 | 20                 | 16,000         |                   |               |                          |                 |
|                              | 50                  | 5                  | 750            |                   |               |                          |                 |
|                              |                     |                    |                | 16,750            | 2             | 1.19                     | 95.5            |
| <b>Rangiroa meso</b>         | 1000                | 50                 | 50,000         |                   |               |                          |                 |
|                              |                     |                    |                | 50,000            | 0             | 0                        |                 |

|                            |      |    |        |        |   |      |
|----------------------------|------|----|--------|--------|---|------|
| Rangiroa<br><i>shallow</i> | 1000 | 50 | 50,000 | 55,000 | 2 | 0.36 |
|                            | 100  | 50 | 5000   |        |   |      |
| Fakarava<br><i>meso</i>    | 1000 | 50 | 50,000 | 55,000 | 0 | 0    |
|                            | 100  | 50 | 5000   |        |   |      |
| Fakarava<br><i>shallow</i> | 1000 | 50 | 50,000 | 55,000 | 2 | 0.36 |
|                            | 100  | 50 | 5000   |        |   |      |
| Manihi<br><i>meso</i>      | 1000 | 50 | 50,000 | 55,000 | 0 | 0    |
|                            | 100  | 50 | 5000   |        |   |      |
| Manihi<br><i>shallow</i>   | 1000 | 50 | 50,000 | 55,000 | 0 | 0.00 |
|                            | 100  | 50 | 5000   |        |   |      |
| Tubuai<br><i>meso</i>      | 100  | 20 | 2000   | 9000   | 0 | 0    |
|                            | 100  | 20 | 2000   |        |   |      |
|                            | 100  | 50 | 5000   |        |   |      |
| Tubuai<br><i>shallow</i>   | 500  | 5  | 2500   | 7500   | 0 | 0.00 |
|                            | 100  | 50 | 5000   |        |   |      |

Table S2. Anemone bleaching.

|            | Date               | Mesophotic            |                    | Shallow               |                        |
|------------|--------------------|-----------------------|--------------------|-----------------------|------------------------|
|            |                    | Nbr anemones bleached | total Nbr anemones | % of anemone bleached | % of anemones bleached |
| Moorea     | 2019/8/9           | 6                     | 18                 | 33.33                 | 53                     |
|            | 2020/2/7           | 0                     | 18                 | 0.00                  | 0                      |
|            | 2020/6/18          | 0                     | 18                 | 0.00                  | 26                     |
|            | 2020/7/30          | 0                     | 18                 | 0.00                  | 26                     |
|            | <i>Island mean</i> |                       |                    | <b>8.3</b>            | <b>26</b>              |
| Tikehau    | 2018/2/25          | not documented        |                    |                       |                        |
|            | 2021/2/17          | not documented        |                    |                       |                        |
|            | <i>Island mean</i> |                       |                    |                       |                        |
| Tahiti     | 2016/3/12          | 0                     | 2                  | 0.00                  | 52                     |
|            | 2021/5/3           | 0                     | 2                  | 0.00                  | 0                      |
|            | <i>Island mean</i> |                       |                    | <b>0</b>              | <b>26</b>              |
| Total mean |                    |                       |                    | <b>5.6</b>            | <b>26</b>              |

Table S3. Clownfish reproduction.

| Mesophotic:       |                    |                                          |                |                           |                                  | Shallow:     |                                       |
|-------------------|--------------------|------------------------------------------|----------------|---------------------------|----------------------------------|--------------|---------------------------------------|
|                   | Date visited       | % of<br>anemonefish<br>couples with eggs | Date eggs laid | Date nearest<br>Full moon | Date in relation<br>to Full moon | photo        | % of anemonefish<br>couples with eggs |
| <b>Moorea</b>     | 2019/8/9           | 0                                        |                | 2019/8/15                 | 6 days before full moon          |              | 17                                    |
|                   | 2020/2/7           | 0                                        |                | 2020/2/8                  | 1 day before full moon           |              | 35                                    |
|                   | 2020/6/17          | 50                                       | 2020/6/11      | 2020/6/5                  | 6 days after full moon           | Figure S1    | 25                                    |
|                   | 2020/7/29          | 50                                       | 2020/7/26      | 2020/8/3                  | 8 days before full moon          | Figure S2    | 11                                    |
|                   | <i>Island mean</i> | <b>25</b>                                |                |                           |                                  |              | <b>22</b>                             |
| <b>Tikehau</b>    | 2018/2/25          | 0                                        |                | 2018/3/1                  | 4 days before full moon          |              | 26                                    |
|                   | 2021/2/17          | 100                                      | 2021/2/11      | 2021/1/28                 | 14 days after full moon          | Figure S3a,b | 9                                     |
|                   | <i>Island mean</i> | <b>50</b>                                |                |                           |                                  |              | <b>17</b>                             |
| <b>Tahiti</b>     | 2016/3/12          | 0                                        |                | 2016/3/23                 | 11 days before full moon         |              | 6                                     |
|                   | 2021/5/3           | 0                                        |                | 2021/4/26                 | 7 days before full moon          |              | 14                                    |
|                   | <i>Island mean</i> | <b>0</b>                                 |                |                           |                                  |              | <b>10</b>                             |
| <b>Total mean</b> |                    | <b>25</b>                                |                |                           |                                  |              | <b>18</b>                             |

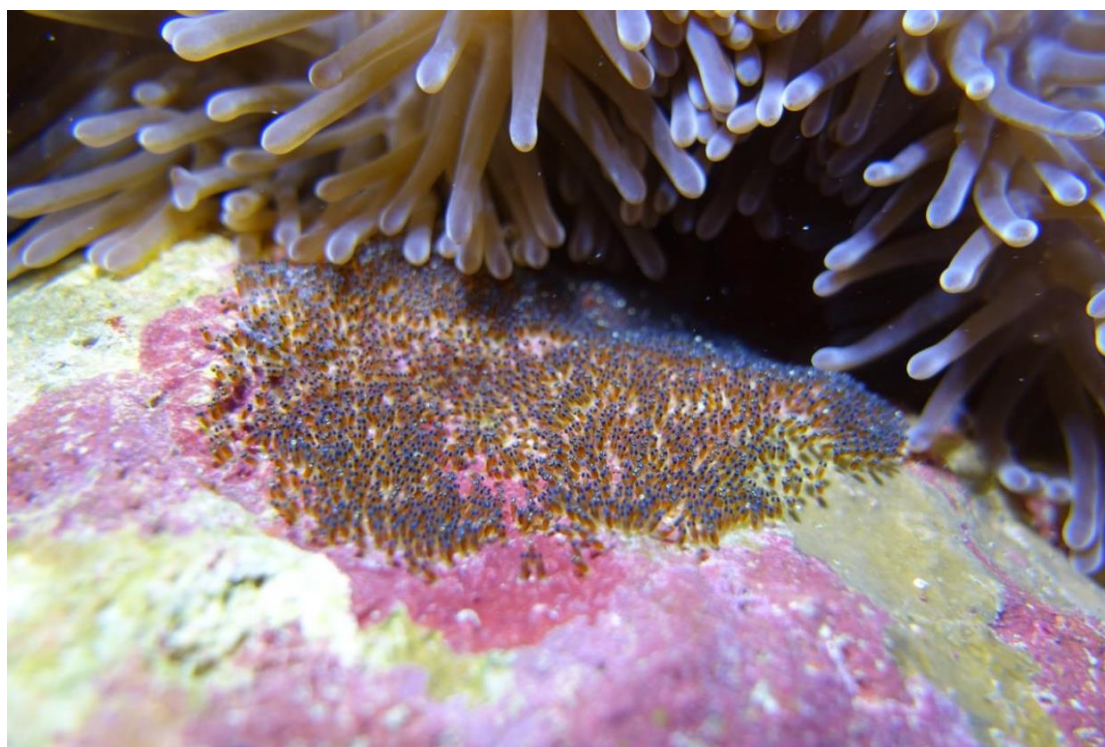

**Figure S1.** Photograph of the nest at Moorea taken on 17th June 2020 at 48 m in the first large group of 16 anemones with eggs that had been laid 6 days prior on 11th June 2020.



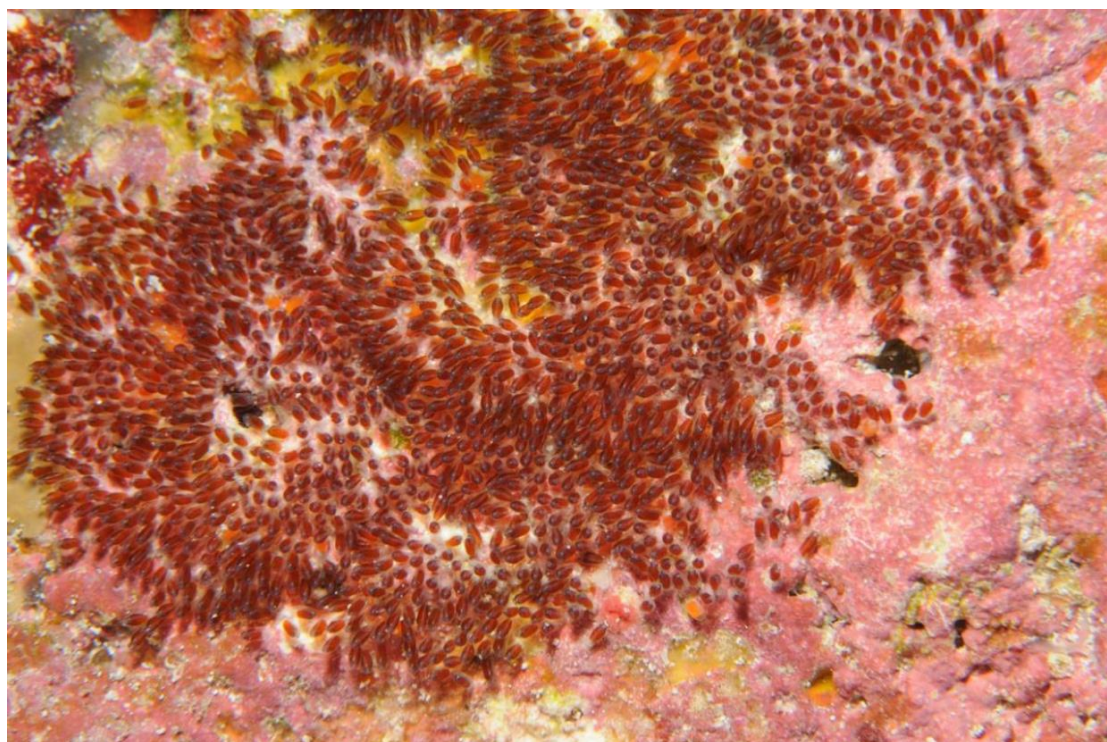

**Figure S2.** Photograph of the nest at Moorea in the second group of two anemones at 50 m taken on the 29th July 2020 laid by the second anemonefish pair with eggs that had been laid 3 days prior on the 26th July 2020.

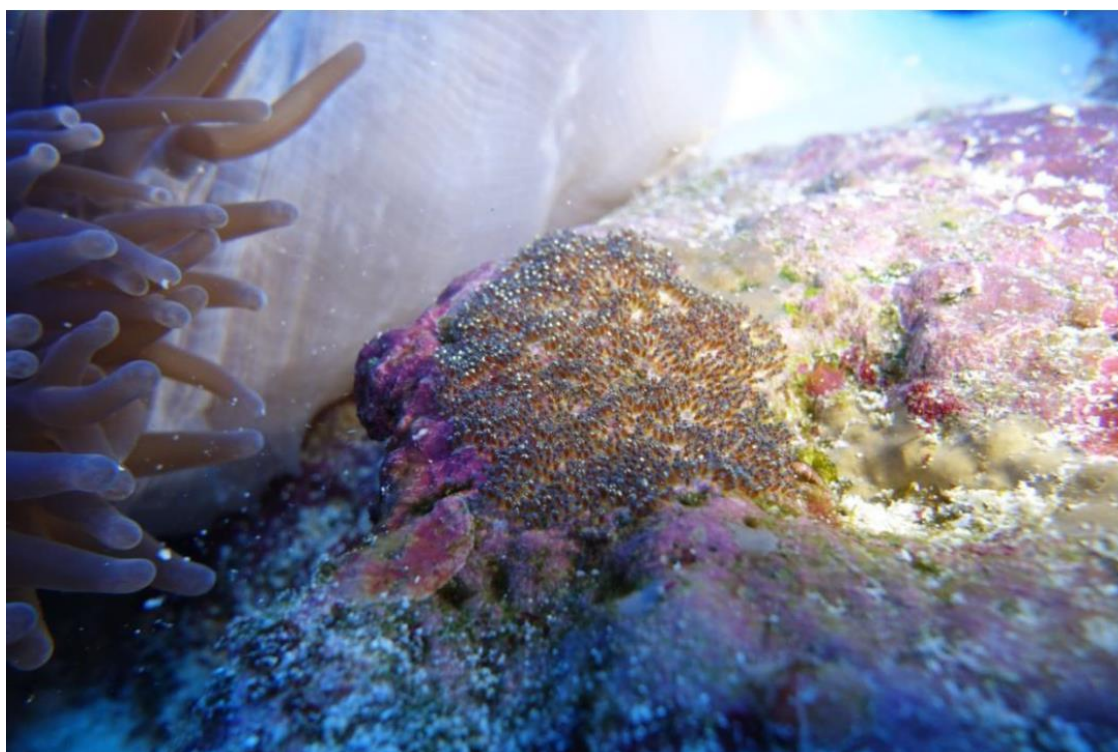

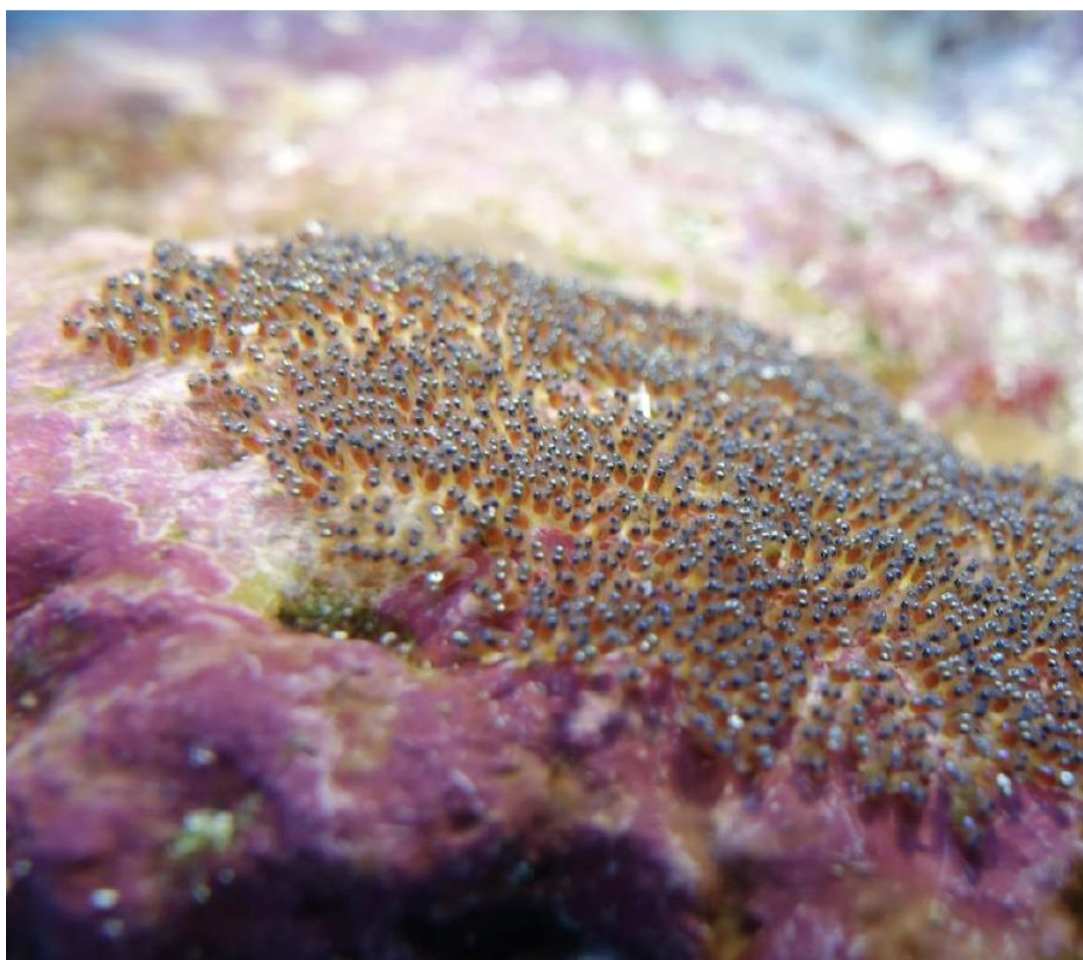

**Figure S3.** Photographs of the nest at Tikehau taken on 17th February 2021 at 55 m with eggs that had been laid 6 days prior on 11th February 2021.
